# Supplementary material for: Role of ZNF224 in c-Myc repression and imatinib responsiveness in chronic myeloid leukemia
Source: PubMed Central journal article supplement (PMC5790473; doi:10.18632/oncotarget.23283), 2017-12-15
Supplement: oncotarget-09-3417-s001.pdf [file oncotarget-09-3417-s001.pdf]

## Role of ZNF224 in c-Myc repression and imatinib responsiveness in chronic myeloid leukemia

### SUPPLEMENTARY MATERIALS

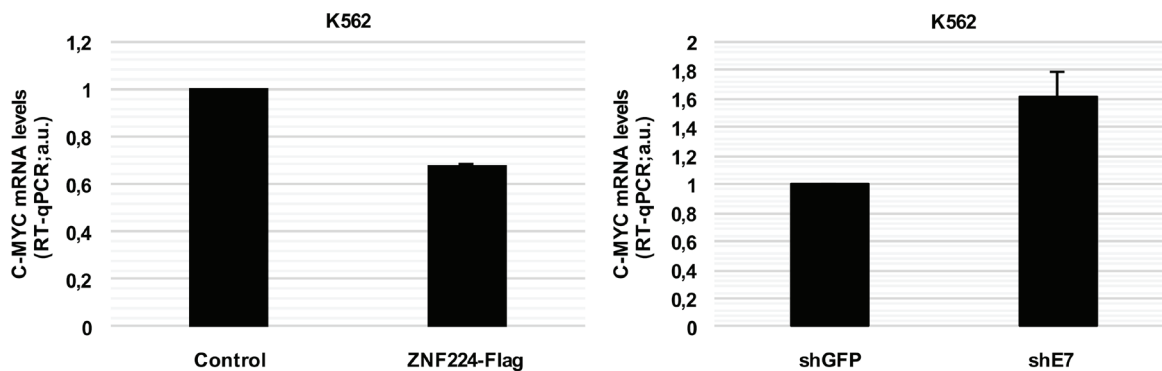

**Supplementary Figure 1: ZNF224 expression affects c-Myc mRNA levels.** ZNF224 and c-Myc mRNA levels were measured by RT-qPCR in K562 transfected with 3X-Flag ZNF224 or 3X-Flag empty vector as control (left panel). ZNF224 and c-Myc mRNA levels were measured by RT-qPCR in shE7 and shGFP K562 cells (right panel). Error bars represent standard deviations of two independent experiments.

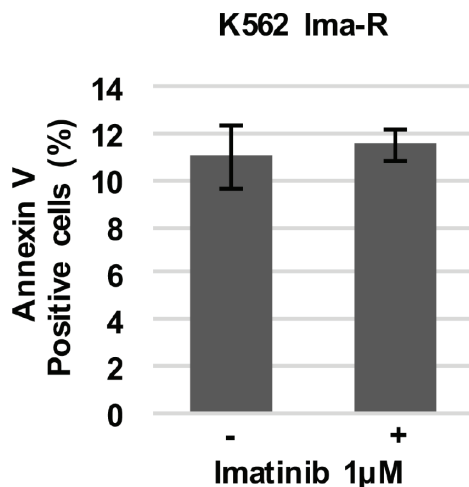

**Supplementary Figure 2: Imatinib does not induce cell death in K562 Ima-R cells.** K562 Ima-R cells were exposed to 1  $\mu$ M Imatinib or vehicle only (DMSO) as control (-) for 48 hours and cell death was determined by annexin V staining followed by flow cytometry. Error bars represent standard deviations of two independent experiments.

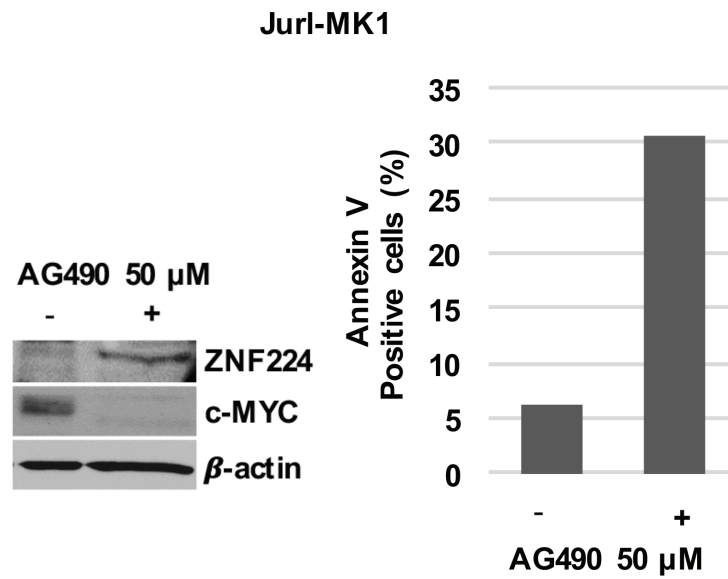

**Supplementary Figure 3: AG490 increases ZNF224 expression and induces cell death in Jurl-MK1 CML cells.** Jurl-MK1 cells were exposed to 50  $\mu$ M AG490 for 48 hours or vehicle only (DMSO) as control (-). ZNF224 and c-Myc protein levels were measured by Western Blot analysis.  $\beta$ -actin was used as loading control. Cell death was evaluated by annexin V staining followed by flow cytometry.

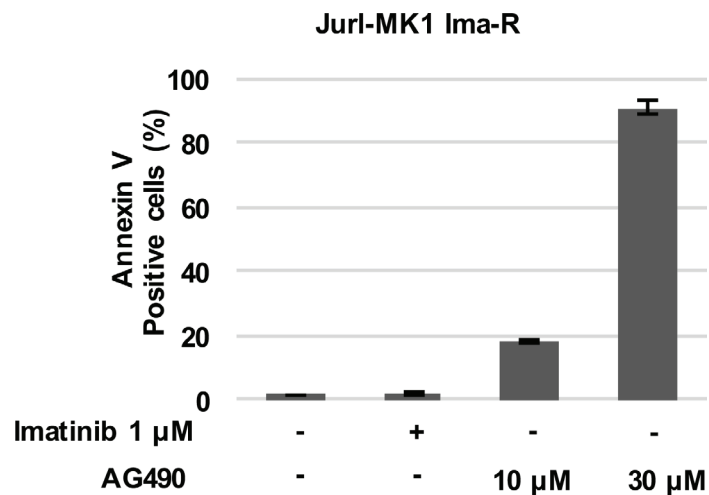

**Supplementary Figure 4: AG490 induces cell death in Jurl-MK1 Ima-R cells.** Jurl-MK1 Ima-R cells were exposed to 1  $\mu$ M Imatinib or increasing concentrations of AG490 (10  $\mu$ M and 30  $\mu$ M) or vehicle only (DMSO) as control (-) for 48 hours. Cell death was determined by annexin V staining followed by flow cytometry. Error bars represent standard deviations of two independent experiments.

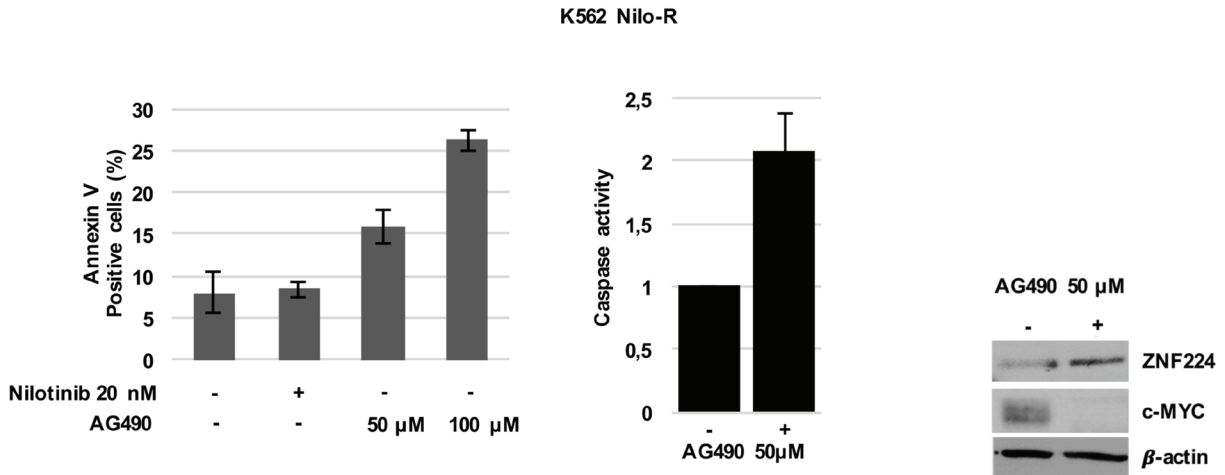

**Supplementary Figure 5: AG490 induces cell death and increases ZNF224 expression in K562 Nilo-R cells.** K562 Nilo-R cells were exposed to 20 nM Nilotinib or increasing concentrations of AG490 (50  $\mu$ M and 100  $\mu$ M) or vehicle only (DMSO) as control (-) for 48 hours. Cell death was determined by annexin V staining followed by flow cytometry. Error bars represent standard deviations of two independent experiments. Caspase activity was biochemically measured. Error bars represent standard deviations of two independent experiments. ZNF224 and c-Myc protein levels were measured by Western blot analysis.  $\beta$ -actin was used as loading control. One representative blot out of two is presented.
